# Supplementary material for: Association of Plasma Zinc and Copper with Body Composition, Lipids and Inflammation in a Cross-Sectional General Population Sample from Germany
Source: MDPI journal article supplement (doi:10.3390/nu15204460), 2023-10-20
Supplement: s1 [file s1]

## Supplementary Materials

# Association of Plasma Zinc and Copper with Body Composition, Lipids and Inflammation in a Cross-Sectional General Population Sample from Germany

Cara Övermöhle <sup>1,\*</sup>, Gerald Rimbach <sup>2</sup>, Sabina Waniek <sup>1</sup>, Eike A. Strathmann <sup>1</sup>, Tatjana Liedtke <sup>1</sup>, Paula Stürmer <sup>1</sup>, Marcus Both <sup>3</sup>, Katharina S. Weber <sup>1,†</sup> and Wolfgang Lieb <sup>1,†</sup>

<sup>1</sup> Institute of Epidemiology, Kiel University, 24105 Kiel, Germany; katharina.weber@epi.uni-kiel.de (K.S.W.); wolfgang.lieb@epi.uni-kiel.de (W.L.)

<sup>2</sup> Institute of Human Nutrition and Food Science, Kiel University, 24118 Kiel, Germany

<sup>3</sup> Department of Diagnostic Radiology, University Hospital Schleswig-Holstein, 24105 Kiel, Germany

\* Correspondence: cara.oevermoehle@epi.uni-kiel.de; Tel.: +49(0)431-500-30223

† These authors contributed equally to this work.

**Table S1:** Main characteristics of participants, separate for those individuals included and excluded in analyses in participants from the first follow-up examination (2010-2012) in the popgen-cohort from Northern Germany.

|                                                                                                           | Participants<br>included in overall<br>analysis (n=841) | Participants<br>excluded from<br>overall analysis<br>(n=88) | <i>P</i> <sup>*1</sup> | Participants<br>included in<br>analysis of<br>adipose tissue<br>(n=534) | Participants<br>excluded from<br>analysis of<br>adipose tissue<br>(n=395) | <i>P</i> <sup>*2</sup> | Participants<br>included in<br>analysis of liver<br>fat (n=538) | Participants<br>excluded from<br>analysis of liver<br>fat (n=391) | <i>P</i> <sup>*3</sup> |
|-----------------------------------------------------------------------------------------------------------|---------------------------------------------------------|-------------------------------------------------------------|------------------------|-------------------------------------------------------------------------|---------------------------------------------------------------------------|------------------------|-----------------------------------------------------------------|-------------------------------------------------------------------|------------------------|
| <i>n</i> (% female) <sup>a,d</sup>                                                                        | 841 (42)                                                | 87 (52)                                                     | 0.077                  | 534 (41)                                                                | 394 (45)                                                                  | 0.318                  | 538 (42)                                                        | 390 (43)                                                          | 0.772                  |
| Plasma concentration of<br>zinc (µg/L) <sup>b</sup>                                                       | 695.0 ± 83.1                                            | 708.1 ± 132.2                                               | 0.187                  | 699.6 ± 85.3                                                            | 691.7 ± 93.4                                                              | 0.180                  | 698.6 ± 85.6                                                    | 693 ± 93.3                                                        | 0.347                  |
| Plasma concentration of<br>copper (µg/L) <sup>b</sup>                                                     | 1020.0 ± 903.4                                          | 1143.6 ± 991.7                                              | <0.001                 | 1014.6 ± 899.9                                                          | 1052.0 ± 920.0                                                            | <0.001                 | 1018.6 ± 906.0                                                  | 1040.6 ± 914.9                                                    | 0.001                  |
| Age (years) <sup>b</sup>                                                                                  | 61 ± 12                                                 | 56 ± 15                                                     | 0.001                  | 61 ± 12                                                                 | 60 ± 14                                                                   | 0.072                  | 61 ± 12                                                         | 59 ± 14                                                           | 0.016                  |
| Body mass index<br>(kg/m <sup>2</sup> ) <sup>b</sup>                                                      | 27.2 ± 4.2                                              | 30.0 ± 8.7                                                  | <0.001                 | 27.0 ± 3.9                                                              | 28.1 ± 6.0                                                                | <0.001                 | 27.0 ± 4.0                                                      | 28.1 ± 5.9                                                        | <0.001                 |
| Current smokers<br>(yes, (%)) <sup>a,e</sup>                                                              | 108 (13)                                                | 22 (29)                                                     | <0.001                 | 46 (9)                                                                  | 84 (22)                                                                   | <0.001                 | 49 (9)                                                          | 81 (21)                                                           | <0.001                 |
| Alcohol intake (g/day) <sup>c,f</sup>                                                                     | 9.0 (3.2; 18.5)                                         | 7.6 (2.1; 18.8)                                             | 0.483                  | 9.8 (4.0; 19.2)                                                         | 7.6 (2.4; 17.2)                                                           | 0.006                  | 9.6 (3.5; 19.0)                                                 | 8.1 (2.8; 18.0)                                                   | 0.092                  |
| Physical activity (MET-<br>hours/week) <sup>c,f</sup>                                                     | 90.5 (59.0; 131.5)                                      | 71.8 (47.1; 103.3)                                          | 0.003                  | 90.2 (59.4; 132.1)                                                      | 87.5 (56.3; 126.8)                                                        | 0.169                  | 91.4 (59.5; 131.7)                                              | 85.6 (55.3; 125.8)                                                | 0.083                  |
| Education level<br>(low [ $< 10$ years],<br>medium [10 years],<br>high [ $\geq 11$ years]) <sup>a,g</sup> | 292 (35)<br>271 (32)<br>278 (33)                        | 31 (37)<br>31 (37)<br>22 (26)                               | 0.422                  | 162 (30)<br>185 (35)<br>187 (35)                                        | 161 (41)<br>117 (30)<br>113 (29)                                          | 0.003                  | 163 (30)<br>188 (35)<br>187 (35)                                | 160 (41)<br>114 (29)<br>113 (29)                                  | 0.002                  |

Values are <sup>a</sup> n (%) (categorical variables), <sup>b</sup> mean ± SD (continuous normally distributed variables); <sup>c</sup> median (IQR) (continuous skewed variables); data only available for <sup>d</sup> n=928, <sup>e</sup> n=917, <sup>f</sup> n=923, <sup>g</sup> n=925.

\* *P* values based on chi-square test (categorical variables), Kruskal-Wallis test (continuous skewed variables) or general linear models (continuous normally distributed variables); <sup>1</sup> *P*-value for comparison between participants included vs. excluded from overall analysis; <sup>2</sup> *P*-values for comparison between participants included vs. excluded from adipose tissue analysis; <sup>3</sup> *P*-values for comparison between participants included vs. excluded from analysis of liver fat.

Abbreviations: CI, confidence interval; IQR, interquartile range; MET, metabolic equivalent of task; SD, standard deviation; T, tertile.

**Table S2:** Associations of plasma zinc and copper concentrations with anthropometric, metabolic and inflammatory traits in participants not taking zinc supplements (n=784).

| Anthropometric, metabolic and inflammatory outcome variables | Zinc                            |                 | Copper                          |                 |
|--------------------------------------------------------------|---------------------------------|-----------------|---------------------------------|-----------------|
|                                                              | Estimates (95% CI) <sup>a</sup> | <i>P</i> values | Estimates (95% CI) <sup>a</sup> | <i>P</i> values |
| Body mass index (kg/m <sup>2</sup> )                         |                                 |                 |                                 |                 |
| Model A1                                                     | 1.56 (0.49; 2.64)               | 0.004           | 0.30 (-0.75; 1.36)              | 0.582           |
| Model A2                                                     | 1.35 (0.30; 2.42)               | 0.012           | 1.44 (0.20; 2.69)               | 0.023           |
| Model A3                                                     | 1.22 (0.18; 2.28)               | 0.021           | 1.44 (0.20; 2.69)               | 0.023           |
| Model A4                                                     | 1.22 (0.18; 2.28)               | 0.022           | 1.45 (0.21; 2.71)               | 0.022           |
| Waist circumference (cm)                                     |                                 |                 |                                 |                 |
| Model A1                                                     | 1.43 (0.48; 2.38)               | 0.003           | -1.89 (-2.79; -0.99)            | <0.001          |
| Model A2                                                     | 0.94 (0.11; 1.79)               | 0.027           | 1.16 (0.18; 2.16)               | 0.020           |
| Model A3                                                     | 0.86 (0.04; 1.70)               | 0.040           | 1.07 (0.09; 2.06)               | 0.033           |
| Model A4                                                     | 0.88 (0.05; 1.71)               | 0.038           | 1.10 (0.12; 2.09)               | 0.028           |
| Waist-to-hip ratio                                           |                                 |                 |                                 |                 |
| Model A1                                                     | 1.16 (0.52; 1.82)               | <0.001          | -2.48 (-3.08; -1.87)            | <0.001          |
| Model A2                                                     | 0.69 (0.21; 1.16)               | 0.005           | 0.63 (0.07; 1.19)               | 0.027           |
| Model A3                                                     | 0.70 (0.23; 1.16)               | 0.003           | 0.40 (-0.15; 0.96)              | 0.153           |
| Model A4                                                     | 0.70 (0.24; 1.17)               | 0.003           | 0.42 (-0.14; 0.97)              | 0.141           |
| Plasma triglyceride concentration (mg/dL)                    |                                 |                 |                                 |                 |
| Model A1                                                     | 3.36 (0.13; 6.68)               | 0.041           | -1.51 (-4.56; 1.64)             | 0.343           |
| Model A2                                                     | 2.63 (-0.53; 5.88)              | 0.103           | 1.35 (-2.30; 5.13)              | 0.474           |
| Model A3                                                     | 1.81 (-1.21; 4.92)              | 0.242           | -0.94 (-4.30; 2.55)             | 0.593           |
| Model A4                                                     | 1.73 (-1.29; 4.84)              | 0.265           | -1.07 (-4.44; 2.42)             | 0.544           |
| Plasma HDL concentration (mg/dL)                             |                                 |                 |                                 |                 |
| Model A1                                                     | -2.01 (-3.82; -0.17)            | 0.032           | 7.32 (5.42; 9.25)               | <0.001          |
| Model A2                                                     | -1.37 (-3.01; 0.31)             | 0.110           | 1.32 (-0.66; 3.35)              | 0.193           |
| Model A3                                                     | -0.44 (-2.00; 1.14)             | 0.583           | 2.86 (1.03; 4.73)               | 0.002           |
| Model A4                                                     | -0.44 (-2.00; 1.15)             | 0.586           | 2.87 (1.03; 4.74)               | 0.002           |
| Plasma LDL concentration (mg/dL)                             |                                 |                 |                                 |                 |
| Model A1                                                     | 3.30 (1.39; 5.24)               | <0.001          | 3.11 (1.22; 5.04)               | 0.001           |
| Model A2                                                     | 3.21 (1.30; 5.15)               | <0.001          | 3.60 (1.36; 5.89)               | 0.002           |
| Model A3                                                     | 3.75 (1.88; 5.66)               | <0.001          | 2.72 (0.58; 4.90)               | 0.012           |
| Model A4                                                     | 3.74 (1.87; 5.64)               | <0.001          | 2.66 (0.53; 4.84)               | 0.014           |
| C-reactive protein (mg/L)                                    |                                 |                 |                                 |                 |
| Model A1                                                     | -6.70 (-12.84; -0.13)           | 0.046           | 38.68 (30.13; 47.79)            | <0.001          |
| Model A2                                                     | -6.91 (-12.99; -0.40)           | 0.038           | 46.98 (36.40; 58.38)            | <0.001          |
| Model A3                                                     | -8.85 (-14.25; -3.11)           | 0.003           | 37.48 (28.28; 47.35)            | <0.001          |
| Model A4                                                     | -8.91 (-14.32; -3.16)           | 0.003           | 37.47 (28.24; 47.36)            | <0.001          |

Model A1 unadjusted. Model A2 adjusted for age and sex. Model A3 additionally adjusted for BMI (not for BMI, waist circumference and waist-to-hip ratio as exposure variable), education, smoking habits, season, lipid-lowering medication (for triglycerides, HDL and LDL as independent variables), fasting status (for triglycerides, HDL and LDL as independent variables) and physical activity and alcohol consumption. Model A4 additionally adjusted for total fat intake and intake of saturated fatty acids.

<sup>a</sup> Regression coefficients indicates the percentage change in outcome variables per 1-SD increment in plasma zinc and copper.

Abbreviations: BMI, body mass index; CI, confidence interval; HDL, high-density lipoprotein cholesterol; LDL, low-density lipoprotein cholesterol.

**Table S3:** Associations of plasma Zn and Cu with subcutaneous and visceral fat (n=534) and with liver signal intensity in participants not taking zinc supplements.

| MRI traits as outcome variables                | Zinc                            |                 | Copper                          |                 |
|------------------------------------------------|---------------------------------|-----------------|---------------------------------|-----------------|
|                                                | Estimates (95% CI) <sup>a</sup> | <i>P values</i> | Estimates (95% CI) <sup>a</sup> | <i>P values</i> |
| Subcutaneous adipose tissue (dm <sup>3</sup> ) |                                 |                 |                                 |                 |
| Model B1                                       | 3.58 (-0.26; 7.56)              | 0.068           | 9.43 (5.51; 13.49)              | <0.001          |
| Model B2                                       | 4.71 (0.98; 8.58)               | 0.013           | 3.22 (-1.14; 7.78)              | 0.150           |
| Model B3                                       | 4.21 (0.50; 8.06)               | 0.026           | 4.23 (-0.19; 8.85)              | 0.061           |
| Model B4                                       | 4.05 (0.32; 7.91)               | 0.033           | 4.14 (-0.29; 8.76)              | 0.067           |
| Model B5                                       | -0.33 (-2.28; 1.67)             | 0.746           | 0.67 (-1.66; 3.07)              | 0.575           |
| Visceral adipose tissue (dm <sup>3</sup> )     |                                 |                 |                                 |                 |
| Model B1                                       | 10.29 (5.47; 15.32)             | <0.001          | -12.46 (-16.17; -8.59)          | <0.001          |
| Model B2                                       | 7.31 (3.36; 11.41)              | <0.001          | 1.52 (-2.96; 6.21)              | 0.512           |
| Model B3                                       | 6.77 (2.94; 10.75)              | <0.001          | 2.62 (-1.81; 7.25)              | 0.250           |
| Model B4                                       | 6.87 (3.01; 10.87)              | <0.001          | 2.65 (-1.79; 7.30)              | 0.246           |
| Model B5                                       | 2.98 (0.37; 5.66)               | 0.025           | -0.35 (-3.35; 2.75)             | 0.823           |
| Liver signal intensity                         |                                 |                 |                                 |                 |
| Model B1                                       | 7.16 (3.34; 11.11)              | <0.001          | -2.32 (-5.80; 1.29)             | 0.205           |
| Model B2                                       | 6.60 (2.87; 10.46)              | <0.001          | -4.21 (-8.21; -0.04)            | 0.048           |
| Model B3                                       | 4.71 (2.24; 7.24)               | <0.001          | -1.12 (-3.94; 1.79)             | 0.447           |
| Model B4                                       | 4.64 (2.16; 7.18)               | <0.001          | -1.14 (-3.96; 1.77)             | 0.440           |
| Model B5                                       | 3.82 (1.42; 6.29)               | 0.002           | -1.74 (-4.47; 1.06)             | 0.219           |

Model B1 unadjusted. Model B2 adjusted for age and sex. Model B3 additionally adjusted for education, smoking habits, season, lipid-lowering medication, prevalent fatty liver disease (for liver signal intensity as outcome variable), physical activity and alcohol consumption. Model B4 additionally adjusted for total fat intake and intake of saturated fatty acids. Model B5 additionally adjusted for BMI

Subcutaneous and visceral adipose tissue and liver signal intensity entered into the models as ln-transformed variables.

<sup>a</sup> Regression coefficients indicates the %-change in subcutaneous and visceral adipose tissue and liver signal intensity per 1-SD increment in plasma zinc and copper concentrations

Abbreviations: BMI, body mass index; CI, confidence interval; MRI, magnet resonance imaging; SD, standard deviation.
